# Supplementary material for: Algorithm-guided goal-directed haemodynamic therapy does not improve renal function after major abdominal surgery compared to good standard clinical care: a prospective randomised trial
Source: Springer Nature journal article supplement (doi:10.1186/s13054-016-1237-1), 2016-03-08
Supplement: MOESM1 [file 9781084]

## One-year follow up

### Telephone questionnaire

|                                                                             |                                       |
|-----------------------------------------------------------------------------|---------------------------------------|
| <b>Question 1:</b> After the surgery on ... did you have another operation? |                                       |
|                                                                             | If yes: When? Where? Kind of Surgery? |
|                                                                             | No                                    |

|                                                                                       |                                     |
|---------------------------------------------------------------------------------------|-------------------------------------|
| <b>Question 2:</b> After the surgery on ... were you admitted to intensive care unit? |                                     |
|                                                                                       | If yes: When? Where? Why? How long? |
|                                                                                       | No                                  |

|                                                                            |                                     |
|----------------------------------------------------------------------------|-------------------------------------|
| <b>Question 3:</b> After the surgery on ... were you admitted to hospital? |                                     |
|                                                                            | If yes: When? Where? Why? How long? |
|                                                                            | No                                  |

|                                                                 |                                 |
|-----------------------------------------------------------------|---------------------------------|
| <b>Question 4:</b> Have you been dialysed within the last year? |                                 |
|                                                                 | If yes: When? Where? How often? |
|                                                                 | No                              |

|                                                                      |                               |
|----------------------------------------------------------------------|-------------------------------|
| <b>Question 5:</b> Have you had a heart attack within the last year? |                               |
|                                                                      | If yes: When? Where? Therapy? |
|                                                                      | No                            |

|                                                                |                                                   |
|----------------------------------------------------------------|---------------------------------------------------|
| <b>Question 6:</b> Have you had a stroke within the last year? |                                                   |
|                                                                | If yes: When? Where? Therapy? Neurologic deficit? |
|                                                                | No                                                |

|                                                      |  |
|------------------------------------------------------|--|
| <b>If patient died within the last year:</b>         |  |
| Date of death:                                       |  |
| Cause of death:                                      |  |
| If death within a hospital:<br>name of the hospital: |  |
